# Supplementary material for: Radiomics-Based Quality Control System for Automatic Cardiac Segmentation: A Feasibility Study
Source: MDPI journal article supplement (doi:10.3390/bioengineering10070791), 2023-07-01
Supplement: s1 [file s1]

**Radiomics based quality control system for automatic cardiac segmentation: a feasibility study**

**Supplementary Materials**

Supplementary figures

Pages 2-7

Supplementary tables

Pages 8-23

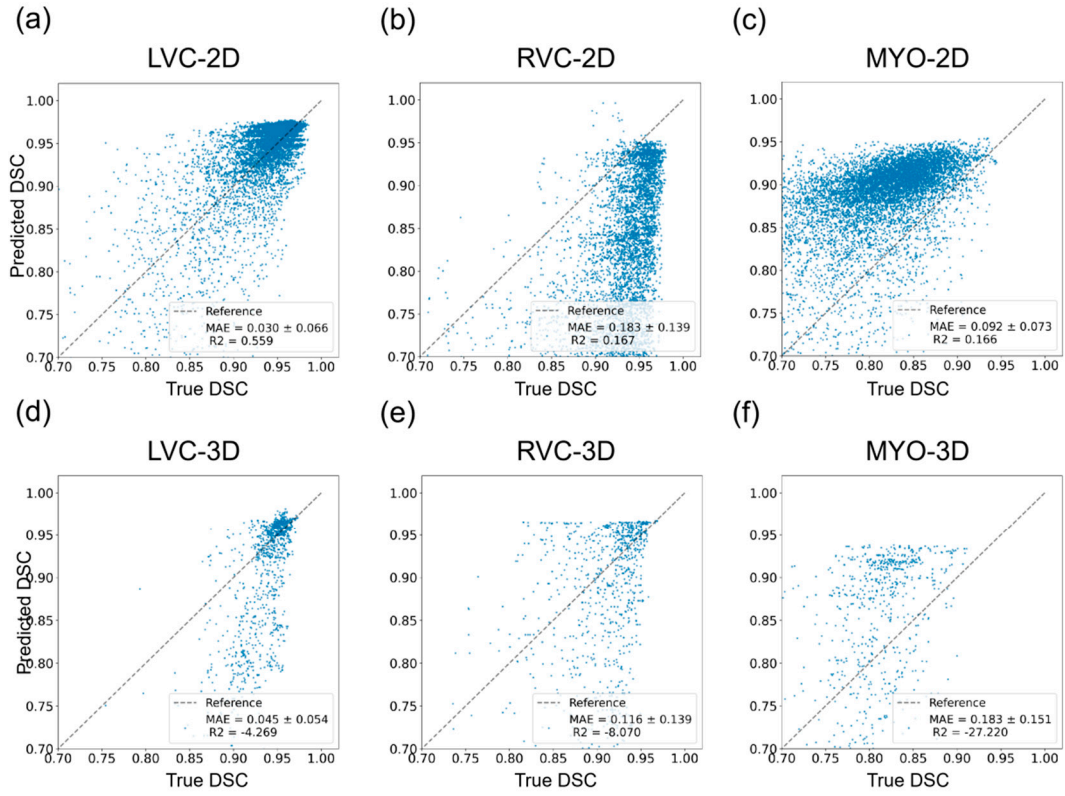

**Supplementary Figure S1.** Results of regression models on external testing data among all six groups, the MAE ± SD and R2 was showed on the figure legend. (a)-(c) show results on LVC-2D, RVC-2D and MYO-2D groups, respectively and (d)-(f) show results of LVC-3D, RVC-3D and MYO-3D groups, respectively.

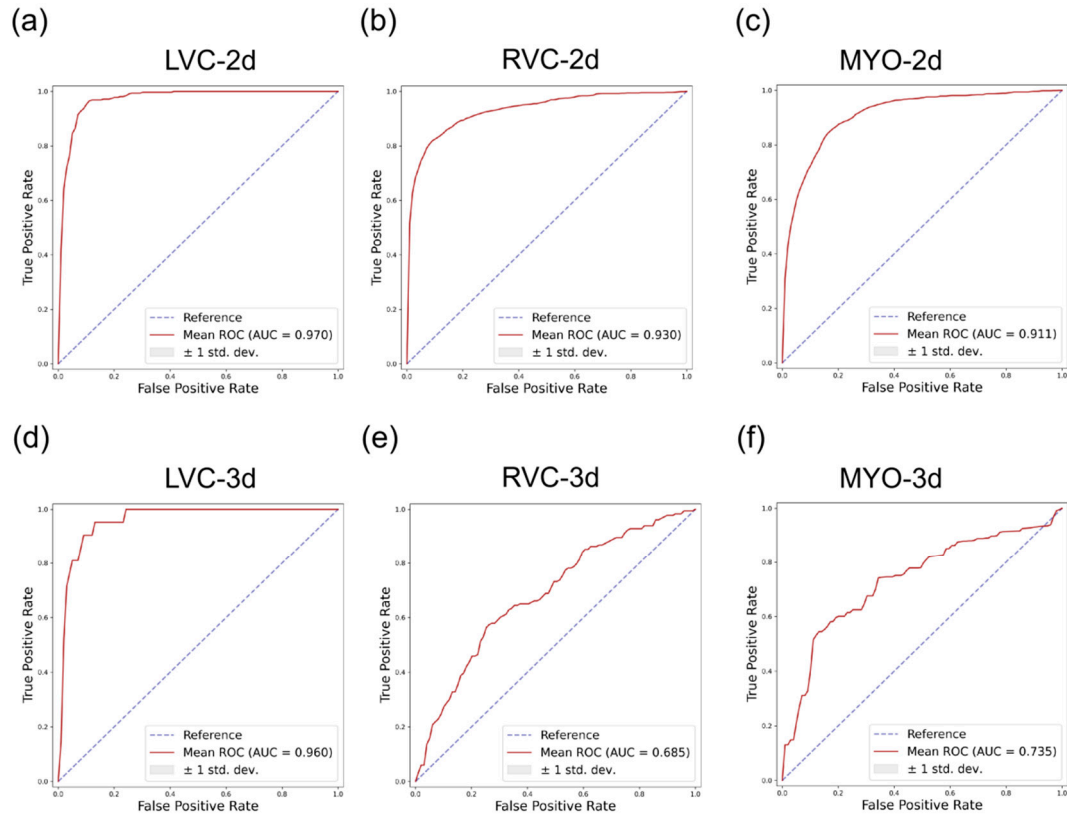

**Supplementary Figure S2.** ROC curves on external testing data among all six groups, the AUC and 95% confidence interval (CI) show on the figure legend. Subplots (a)-(f) are same as in supplementary Figure S1.

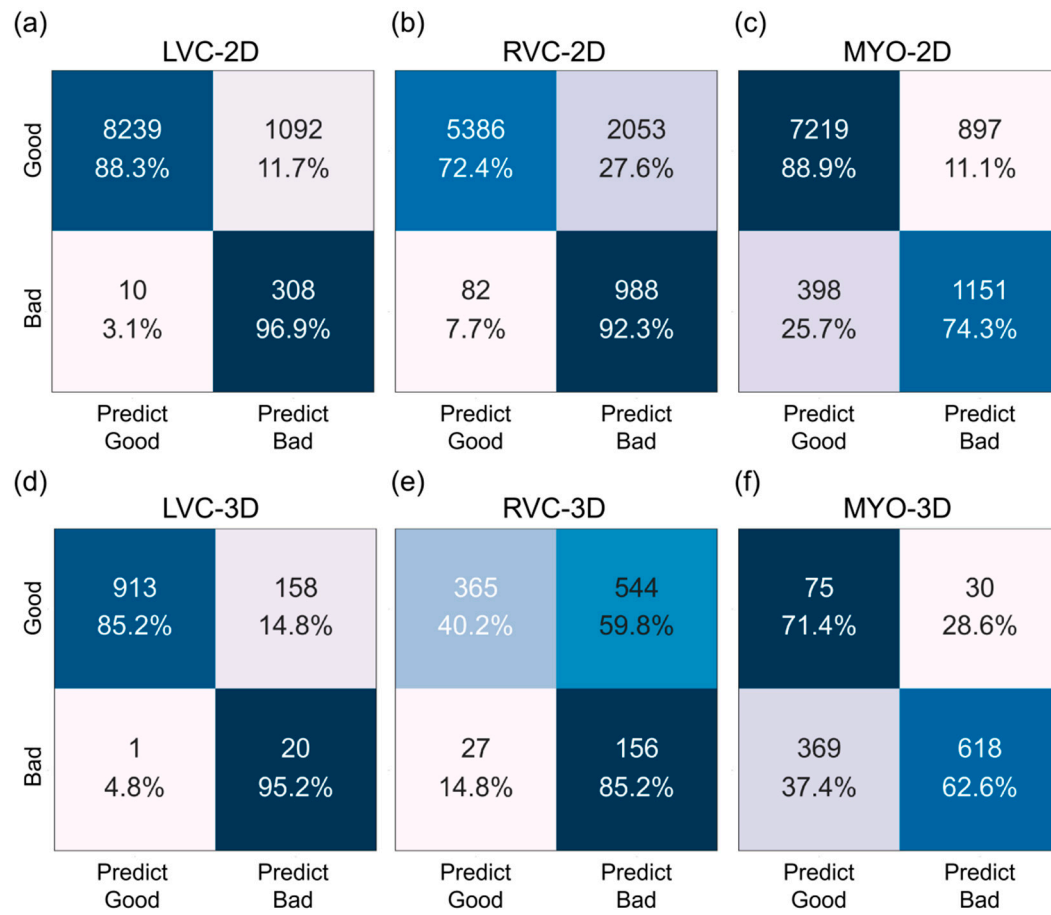

**Supplementary Figure S3.** Confusion matrices of best performance classification model among all six groups on external testing dataset. Subplots (a)-(f) are same as in supplementary Figure S1.

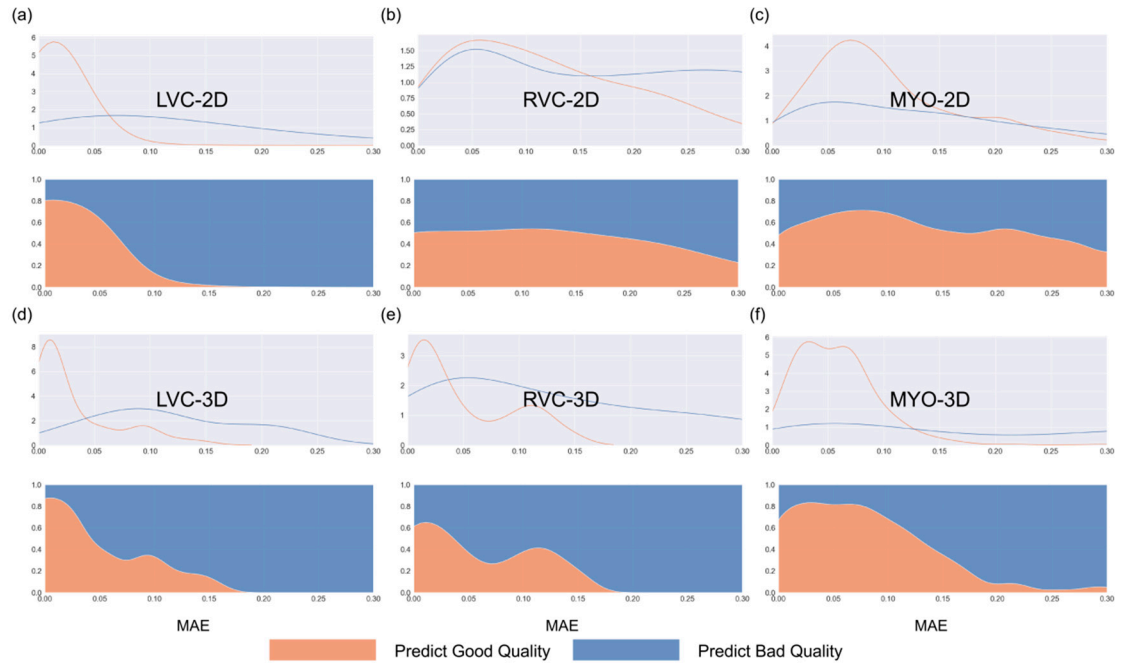

**Supplementary Figure S4.** Density plots for all segmentations among six groups on external testing dataset. Blue represents predicted bad quality and orange represents predicted good quality. The density plots in the first row represents the change between number of segmentations and MAE, while the density plots in the second row (filling mode) show the relative proportion of predicted good or bad segmentations with MAE. Subplots (a)-(f) are same as in supplementary Figure S1.

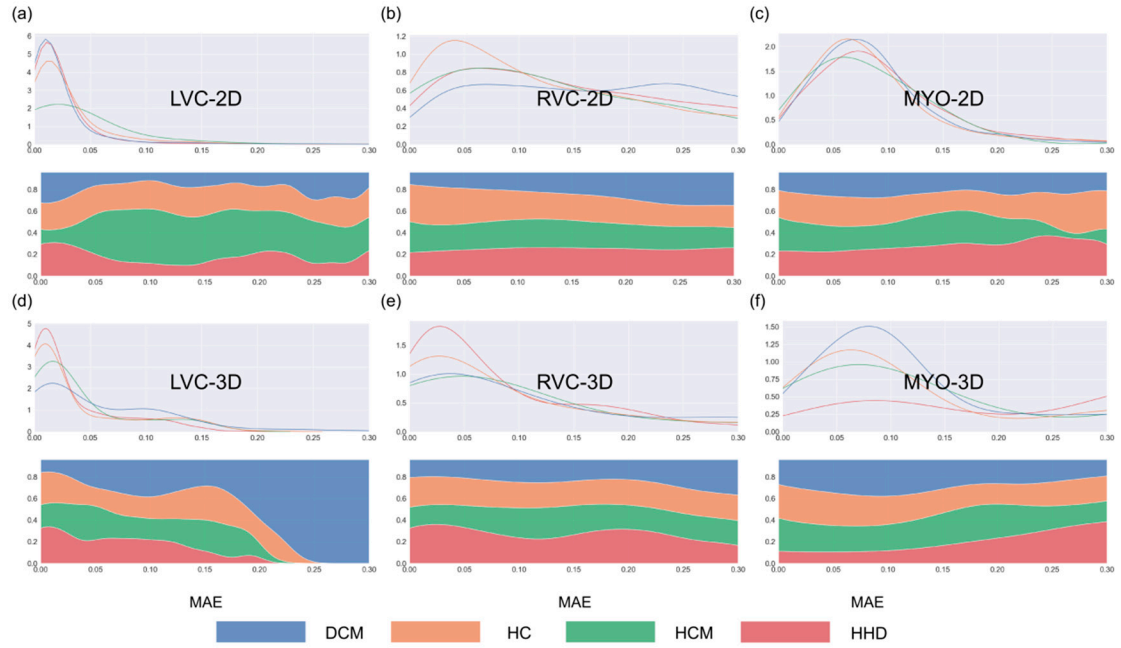

**Supplementary Figure S5.** Density plots for all segmentations among six groups on external testing dataset. Blue, orange, green and red represent DCM, HC, HCM and HHD, respectively. The density plots in the first row represents the change between number of segmentations and MAE, while the density plots in the second row (filling mode) show the relative proportion of different disease types with MAE. Subplots (a)-(f) are same as in supplementary Figure S1.

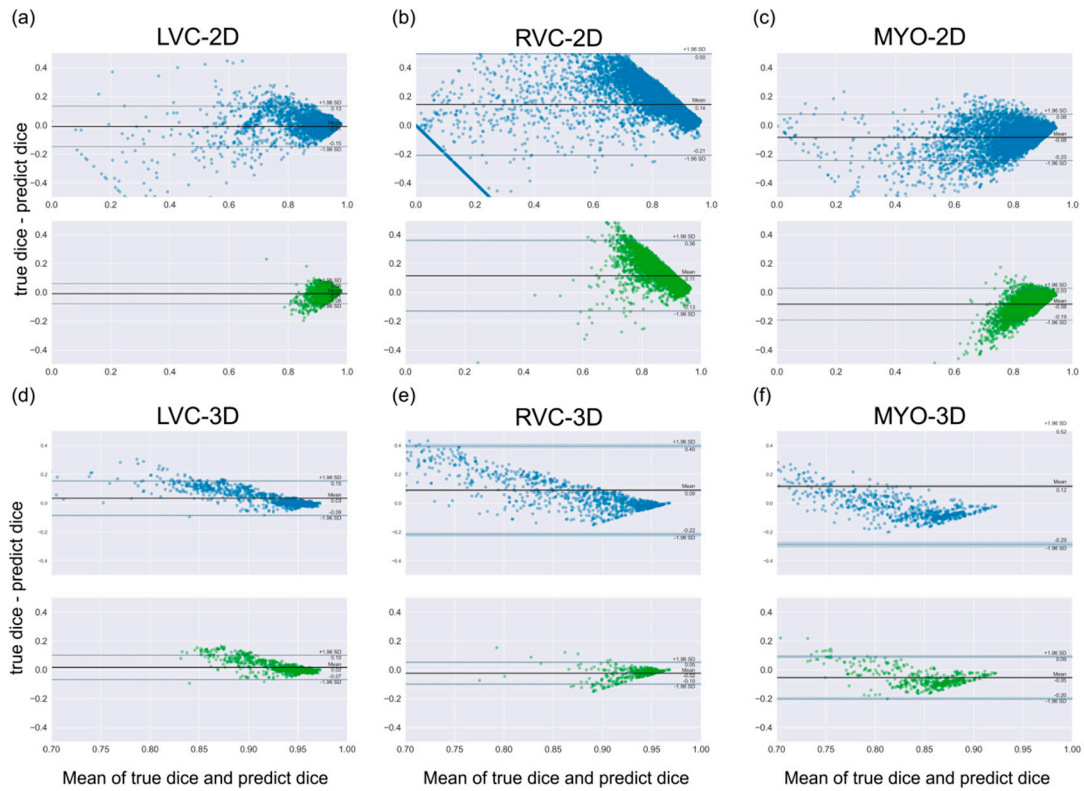

**Supplementary Figure S6.** Bland Altman plots of all segmentations (the first row with blue dots) and predicted good quality segmentations using classification models (the second row with green dots) in external testing dataset. Comparing two Bland Altman plots, the diminished blue dots represented segmentations that were predicted as bad quality. Subplots (a)-(f) are same as in supplementary Figure S1.

Supplementary Table S1. Shows the number of 2D and 3D segmentations for radiomics training dataset.

| Training | LVC    | RVC    | MYO    |
|----------|--------|--------|--------|
| 2D       | 130738 | 118356 | 133207 |
| 3D       | 14874  | 14793  | 14793  |



Supplementary Table S2. Shows the number of 2D and 3D segmentations for radiomics testing dataset.

| Testing | LVC  | RVC  | MYO  |
|---------|------|------|------|
| 2D      | 4188 | 3662 | 4201 |
| 3D      | 460  | 460  | 460  |

Supplementary Table S3. Shows the full feature name list extracted in 3D images.

|            |                                  |       |                                      |
|------------|----------------------------------|-------|--------------------------------------|
| Shape      | Elongation                       | GLCM  | Autocorrelation                      |
|            | Flatness                         |       | ClusterProminence                    |
|            | LeastAxisLength                  |       | ClusterShade                         |
|            | MajorAxisLength                  |       | ClusterTendency                      |
|            | Maximum2DDiameterColumn          |       | Contrast                             |
|            | Maximum2DDiameterRow             |       | Correlation                          |
|            | Maximum2DDiameterSlice           |       | DifferenceAverage                    |
|            | Maximum3DDiameter                |       | DifferenceEntropy                    |
|            | MeshVolume                       |       | DifferenceVariance                   |
|            | MinorAxisLength                  |       | Id                                   |
|            | Sphericity                       |       | Idm                                  |
|            | SurfaceArea                      |       | Idmn                                 |
|            | SurfaceVolumeRatio               |       | Idn                                  |
|            | VoxelVolume                      |       | Imc1                                 |
| Firstorder | 10Percentile                     |       | Imc2                                 |
|            | 90Percentile                     |       | InverseVariance                      |
|            | Energy                           |       | JointAverage                         |
|            | Entropy                          |       | JointEnergy                          |
|            | InterquartileRange               |       | JointEntropy                         |
|            | Kurtosis                         |       | MCC                                  |
|            | Maximum                          |       | MaximumProbability                   |
|            | MeanAbsoluteDeviation            |       | SumAverage                           |
|            | Mean                             |       | SumEntropy                           |
|            | Median                           |       | SumSquares                           |
|            | Minimum                          | GLDM  | DependenceEntropy                    |
|            | Range                            |       | DependenceNonUniformity              |
|            | RobustMeanAbsoluteDeviation      |       | DependenceNonUniformityNormalized    |
|            | RootMeanSquared                  |       | DependenceVariance                   |
|            | Skewness                         |       | GrayLevelNonUniformity               |
|            | TotalEnergy                      |       | GrayLevelVariance                    |
|            | Uniformity                       |       | HighGrayLevelEmphasis                |
|            | Variance                         |       | LargeDependenceEmphasis              |
| NGTDM      | Busyness                         |       | LargeDependenceHighGrayLevelEmphasis |
|            | Coarseness                       |       | LargeDependenceLowGrayLevelEmphasis  |
|            | Complexity                       |       | LowGrayLevelEmphasis                 |
|            | Contrast                         |       | SmallDependenceEmphasis              |
|            | Strength                         |       | SmallDependenceHighGrayLevelEmphasis |
| GLSZM      | GrayLevelNonUniformity           | GLRLM | SmallDependenceLowGrayLevelEmphasis  |
|            | GrayLevelNonUniformityNormalized |       | GrayLevelNonUniformity               |
|            | GrayLevelVariance                |       | GrayLevelNonUniformityNormalized     |
|            | HighGrayLevelZoneEmphasis        |       | GrayLevelVariance                    |
|            | LargeAreaEmphasis                |       | HighGrayLevelRunEmphasis             |

|                                                                                                                                                                                                                                                                                                                                    |                                 |  |                                  |
|------------------------------------------------------------------------------------------------------------------------------------------------------------------------------------------------------------------------------------------------------------------------------------------------------------------------------------|---------------------------------|--|----------------------------------|
|                                                                                                                                                                                                                                                                                                                                    | LargeAreaHighGrayLevelEmphasis  |  | LongRunEmphasis                  |
|                                                                                                                                                                                                                                                                                                                                    | LargeAreaLowGrayLevelEmphasis   |  | LongRunHighGrayLevelEmphasis     |
|                                                                                                                                                                                                                                                                                                                                    | LowGrayLevelZoneEmphasis        |  | LongRunLowGrayLevelEmphasis      |
|                                                                                                                                                                                                                                                                                                                                    | SizeZoneNonUniformity           |  | LowGrayLevelRunEmphasis          |
|                                                                                                                                                                                                                                                                                                                                    | SizeZoneNonUniformityNormalized |  | RunEntropy                       |
|                                                                                                                                                                                                                                                                                                                                    | SmallAreaEmphasis               |  | RunLengthNonUniformity           |
|                                                                                                                                                                                                                                                                                                                                    | SmallAreaHighGrayLevelEmphasis  |  | RunLengthNonUniformityNormalized |
|                                                                                                                                                                                                                                                                                                                                    | SmallAreaLowGrayLevelEmphasis   |  | RunPercentage                    |
|                                                                                                                                                                                                                                                                                                                                    | ZoneEntropy                     |  | RunVariance                      |
|                                                                                                                                                                                                                                                                                                                                    | ZonePercentage                  |  | ShortRunEmphasis                 |
|                                                                                                                                                                                                                                                                                                                                    | ZoneVariance                    |  | ShortRunHighGrayLevelEmphasis    |
|                                                                                                                                                                                                                                                                                                                                    |                                 |  | ShortRunLowGrayLevelEmphasis     |
| <p>GLCM: gray level co-occurrence matrix; GLDM: gray level dependence matrix; GLRLM : gray level run length matrix; GLSZM: gray level size zone matrix; LOG: Laplace of Gaussian; NGTDM: Neighboring gray tone difference matrix.</p> <p>Other abbreviation for specific features could be found in Pyradiomics documentation.</p> |                                 |  |                                  |

Supplementary Table S4. Shows the full feature name list extracted in2D images.

|            |                             |       |                                      |
|------------|-----------------------------|-------|--------------------------------------|
| Shape      | Elongation                  | GLDM  | DependenceEntropy                    |
|            | MajorAxisLength             |       | DependenceNonUniformity              |
|            | MaximumDiameter             |       | DependenceNonUniformityNormalized    |
|            | MeshSurface                 |       | DependenceVariance                   |
|            | MinorAxisLength             |       | GrayLevelNonUniformity               |
|            | Perimeter                   |       | GrayLevelVariance                    |
|            | PerimeterSurfaceRatio       |       | HighGrayLevelEmphasis                |
|            | PixelSurface                |       | LargeDependenceEmphasis              |
|            | Sphericity                  |       | LargeDependenceHighGrayLevelEmphasis |
| Firstorder | 10Percentile                |       | LargeDependenceLowGrayLevelEmphasis  |
|            | 90Percentile                |       | LowGrayLevelEmphasis                 |
|            | Energy                      |       | SmallDependenceEmphasis              |
|            | Entropy                     |       | SmallDependenceHighGrayLevelEmphasis |
|            | InterquartileRange          |       | SmallDependenceLowGrayLevelEmphasis  |
|            | Kurtosis                    | GLRLM | GrayLevelNonUniformity               |
|            | Maximum                     |       | GrayLevelNonUniformityNormalized     |
|            | MeanAbsoluteDeviation       |       | GrayLevelVariance                    |
|            | Mean                        |       | HighGrayLevelRunEmphasis             |
|            | Median                      |       | LongRunEmphasis                      |
|            | Minimum                     |       | LongRunHighGrayLevelEmphasis         |
|            | Range                       |       | LongRunLowGrayLevelEmphasis          |
|            | RobustMeanAbsoluteDeviation |       | LowGrayLevelRunEmphasis              |
|            | RootMeanSquared             |       | RunEntropy                           |
|            | Skewness                    |       | RunLengthNonUniformity               |
|            | TotalEnergy                 |       | RunLengthNonUniformityNormalized     |
|            | Uniformity                  |       | RunPercentage                        |
|            | Variance                    |       | RunVariance                          |
| NGTDM      | Busyness                    |       | ShortRunEmphasis                     |
|            | Coarseness                  |       | ShortRunHighGrayLevelEmphasis        |
|            | Complexity                  |       | ShortRunLowGrayLevelEmphasis         |
|            | Contrast                    | GLSZM | GrayLevelNonUniformity               |
|            | Strength                    |       | GrayLevelNonUniformityNormalized     |
| GLCM       | Autocorrelation             |       | GrayLevelVariance                    |
|            | ClusterProminence           |       | HighGrayLevelZoneEmphasis            |
|            | ClusterShade                |       | LargeAreaEmphasis                    |
|            | ClusterTendency             |       | LargeAreaHighGrayLevelEmphasis       |
|            | Contrast                    |       | LargeAreaLowGrayLevelEmphasis        |
|            | Correlation                 |       | LowGrayLevelZoneEmphasis             |
|            | DifferenceAverage           |       | SizeZoneNonUniformity                |
|            | DifferenceEntropy           |       | SizeZoneNonUniformityNormalized      |
|            | DifferenceVariance          |       | SmallAreaEmphasis                    |
|            | Id                          |       | SmallAreaHighGrayLevelEmphasis       |

|                                                                                                                                                                                                                                |                    |  |                               |
|--------------------------------------------------------------------------------------------------------------------------------------------------------------------------------------------------------------------------------|--------------------|--|-------------------------------|
|                                                                                                                                                                                                                                | Idm                |  | SmallAreaLowGrayLevelEmphasis |
|                                                                                                                                                                                                                                | Idmn               |  | ZoneEntropy                   |
|                                                                                                                                                                                                                                | Idn                |  | ZonePercentage                |
|                                                                                                                                                                                                                                | Imc1               |  | ZoneVariance                  |
|                                                                                                                                                                                                                                | Imc2               |  |                               |
|                                                                                                                                                                                                                                | InverseVariance    |  |                               |
|                                                                                                                                                                                                                                | JointAverage       |  |                               |
|                                                                                                                                                                                                                                | JointEnergy        |  |                               |
|                                                                                                                                                                                                                                | JointEntropy       |  |                               |
|                                                                                                                                                                                                                                | MCC                |  |                               |
|                                                                                                                                                                                                                                | MaximumProbability |  |                               |
|                                                                                                                                                                                                                                | SumAverage         |  |                               |
|                                                                                                                                                                                                                                | SumEntropy         |  |                               |
|                                                                                                                                                                                                                                | SumSquares         |  |                               |
| GLCM: gray level co-occurrence matrix; GLDM: gray level dependence matrix; GLRLM : gray level run length matrix; GLSZM: gray level size zone matrix; LOG: Laplace of Gaussian; NGTDM: Neighboring gray tone difference matrix. |                    |  |                               |
| Other abbreviation for specific features could be found in Pyradiomics documentation.                                                                                                                                          |                    |  |                               |

Supplementary Table S5. Shows the best DSC prediction MAE of different structures with five regression models.

|    | Structures | Random Forest | Gradient Boost | K-Nearest<br>Neighbour | Linear<br>Regression | Multi-Layer<br>Perceptron |
|----|------------|---------------|----------------|------------------------|----------------------|---------------------------|
| 2D | LVC        | 0.031         | 0.021          | 0.024                  | <b>0.020</b>         | 0.021                     |
|    | RVC        | 0.071         | <b>0.060</b>   | 0.069                  | 0.075                | 0.059                     |
|    | MYO        | 0.066         | <b>0.032</b>   | 0.054                  | 0.062                | 0.046                     |
| 3D | LVC        | 0.013         | <b>0.011</b>   | 0.013                  | 0.016                | 0.014                     |
|    | RVC        | 0.035         | <b>0.027</b>   | 0.037                  | 0.036                | 0.033                     |
|    | MYO        | 0.020         | <b>0.017</b>   | 0.020                  | 0.030                | 0.023                     |

Supplementary Table S6. Shows the best classification model performance of different structures with RF classifiers.

|    | Cardiac<br>sub-structure | Accuracy | Precision | Recall | F1   | NDR   |
|----|--------------------------|----------|-----------|--------|------|-------|
| 2D | LVC                      | 96.1     | 99.9      | 98.7   | 99.3 | 93.0  |
|    | RVC                      | 95.9     | 99.1      | 92.9   | 95.9 | 90.0  |
|    | MYO                      | 92.1     | 99.5      | 97.3   | 98.4 | 85.5  |
| 3D | LVC                      | 99.1     | 100.0     | 99.8   | 99.9 | 100.0 |
|    | RVC                      | 87.6     | 92.9      | 95.9   | 90.0 | 22.2  |
|    | MYO                      | 89.1     | 94.9      | 86.1   | 90.3 | 75.0  |

Supplementary Table S7. Shows the top 12 features with highest mutual information score among 6 groups.

| Structure | Feature name                                           | Mutual Information Score |
|-----------|--------------------------------------------------------|--------------------------|
| LVC-2D    | lvc_original_shape2D_PerimeterSurfaceRatio             | 0.404624174              |
|           | lvc_original_shape2D_Sphericity                        | 0.383862508              |
|           | lvc_original_shape2D_MajorAxisLength                   | 0.307065033              |
|           | lvc_original_firstorder_Energy                         | 0.271998628              |
|           | lvc_original_shape2D_Elongation                        | 0.248959322              |
|           | lvc_original_firstorder_90Percentile                   | 0.162686545              |
|           | lvc_original_gldm_LowGrayLevelEmphasis                 | 0.16086934               |
|           | lvc_original_firstorder_Skewness                       | 0.158071744              |
|           | lvc_original_firstorder_InterquartileRange             | 0.140505911              |
|           | lvc_original_gldm_ClusterShade                         | 0.139599753              |
|           | lvc_original_gldm_LargeDependenceHighGrayLevelEmphasis | 0.135106091              |
|           | lvc_original_firstorder_Minimum                        | 0.132781633              |
| RVC-2D    | rvc_original_shape2D_PerimeterSurfaceRatio             | 0.651769482              |
|           | rvc_original_shape2D_Sphericity                        | 0.437640137              |
|           | rvc_original_shape2D_MeshSurface                       | 0.42582423               |
|           | rvc_original_gldm_LowGrayLevelEmphasis                 | 0.421417772              |
|           | rvc_original_firstorder_Minimum                        | 0.395356937              |
|           | rvc_original_gldm_LargeDependenceLowGrayLevelEmphasis  | 0.30917076               |
|           | rvc_original_glszm_LargeAreaHighGrayLevelEmphasis      | 0.305207228              |
|           | rvc_original_firstorder_Entropy                        | 0.264894479              |
|           | rvc_original_shape2D_MajorAxisLength                   | 0.226848492              |
|           | rvc_original_firstorder_InterquartileRange             | 0.221537768              |
|           | rvc_original_shape2D_Elongation                        | 0.20943546               |
|           | rvc_original_glszm_LargeAreaLowGrayLevelEmphasis       | 0.193302097              |
| MYO-2D    | myo_original_shape2D_Elongation                        | 0.302787433              |
|           | myo_original_shape2D_PerimeterSurfaceRatio             | 0.29106965               |
|           | myo_original_shape2D_MeshSurface                       | 0.21748549               |
|           | myo_original_shape2D_Sphericity                        | 0.216930499              |
|           | myo_original_ngtdm_Strength                            | 0.16516617               |
|           | myo_original_glszm_LargeAreaHighGrayLevelEmphasis      | 0.151299115              |
|           | myo_original_ngtdm_Contrast                            | 0.145962695              |
|           | myo_original_ngtdm_Busyness                            | 0.140742989              |
|           | myo_original_firstorder_Energy                         | 0.13926522               |
|           | myo_original_gldm_SmallDependenceLowGrayLevelEmphasis  | 0.134709171              |
|           | myo_original_firstorder_90Percentile                   | 0.129108255              |
|           | myo_original_firstorder_Entropy                        | 0.12807348               |
| LVC-3D    | lvc_original_shape_Sphericity                          | 0.801555464              |
|           | lvc_original_shape_SurfaceVolumeRatio                  | 0.559563117              |
|           | lvc_original_shape_Maximum2DDiameterRow                | 0.401134873              |
|           | lvc_original_firstorder_Energy                         | 0.291617701              |
|           | lvc_original_shape_Maximum2DDiameterSlice              | 0.228552073              |



|                                                                        |                                                        |             |
|------------------------------------------------------------------------|--------------------------------------------------------|-------------|
|                                                                        | lvc_original_firstorder_90Percentile                   | 0.225381944 |
|                                                                        | lvc_original_firstorder_Maximum                        | 0.2157373   |
|                                                                        | lvc_original_ngtdm_Coarseness                          | 0.20895502  |
|                                                                        | lvc_original_shape_MajorAxisLength                     | 0.205803892 |
|                                                                        | lvc_original_firstorder_Minimum                        | 0.205247547 |
|                                                                        | lvc_original_shape_Maximum2DDiameterColumn             | 0.203783679 |
|                                                                        | lvc_original_firstorder_Range                          | 0.203574815 |
| RVC-3D                                                                 | rvc_original_shape_SurfaceVolumeRatio                  | 0.953131487 |
|                                                                        | rvc_original_shape_Sphericity                          | 0.760510463 |
|                                                                        | rvc_original_shape_MeshVolume                          | 0.536610765 |
|                                                                        | rvc_original_firstorder_Energy                         | 0.50027088  |
|                                                                        | rvc_original_ngtdm_Coarseness                          | 0.499546949 |
|                                                                        | rvc_original_shape_SurfaceArea                         | 0.37876214  |
|                                                                        | rvc_original_gldm_LargeDependenceHighGrayLevelEmphasis | 0.37147254  |
|                                                                        | rvc_original_firstorder_Range                          | 0.356044341 |
|                                                                        | rvc_original_gldm_Autocorrelation                      | 0.34359162  |
|                                                                        | rvc_original_glszm_LargeAreaEmphasis                   | 0.341907675 |
|                                                                        | rvc_original_gldm_Contrast                             | 0.334234088 |
|                                                                        | rvc_original_shape_MajorAxisLength                     | 0.327433698 |
|                                                                        |                                                        |             |
| MYO-3D                                                                 | myo_original_ngtdm_Coarseness                          | 0.71248084  |
|                                                                        | myo_original_shape_SurfaceVolumeRatio                  | 0.576295938 |
|                                                                        | myo_original_shape_MeshVolume                          | 0.575677495 |
|                                                                        | myo_original_ngtdm_Strength                            | 0.551352337 |
|                                                                        | myo_original_firstorder_Energy                         | 0.537937392 |
|                                                                        | myo_original_shape_Sphericity                          | 0.347250649 |
|                                                                        | myo_original_gldm_LowGrayLevelEmphasis                 | 0.329789701 |
|                                                                        | myo_original_gldm_Correlation                          | 0.315698884 |
|                                                                        | myo_original_shape_MajorAxisLength                     | 0.314293937 |
|                                                                        | myo_original_gldm_LargeDependenceLowGrayLevelEmphasis  | 0.312423599 |
|                                                                        | myo_original_shape_Maximum2DDiameterRow                | 0.302618722 |
|                                                                        | myo_original_firstorder_Entropy                        | 0.293561658 |
|                                                                        |                                                        |             |
| The bold lines represent features used in the best performance models. |                                                        |             |

Supplementary Table S8. Shows the top 12 features with highest F-statistics among 6 groups.

| Structure | Feature name                                           | F-value     | P-value   |
|-----------|--------------------------------------------------------|-------------|-----------|
| LVC-2D    | lvc_original_shape2D_Elongation                        | 42844.52103 | 0         |
|           | lvc_original_shape2D_PerimeterSurfaceRatio             | 27573.03972 | 0         |
|           | lvc_original_shape2D_Sphericity                        | 25123.83724 | 0         |
|           | lvc_original_firstorder_Entropy                        | 13393.33004 | 0         |
|           | lvc_original_gldm_ClusterShade                         | 6029.347552 | 0         |
|           | lvc_original_gldm_Imc1                                 | 5558.9091   | 0         |
|           | lvc_original_firstorder_InterquartileRange             | 5201.938301 | 0         |
|           | lvc_original_gldm_LargeDependenceLowGrayLevelEmphasis  | 5036.970541 | 0         |
|           | lvc_original_firstorder_Minimum                        | 4526.834322 | 0         |
|           | lvc_original_firstorder_Skewness                       | 4152.646334 | 0         |
|           | lvc_original_gldm_LargeDependenceHighGrayLevelEmphasis | 4097.109596 | 0         |
|           | lvc_original_shape2D_MajorAxisLength                   | 3985.320238 | 0         |
| RVC-2D    | rvc_original_firstorder_Minimum                        | 71618.73185 | 0         |
|           | rvc_original_shape2D_PerimeterSurfaceRatio             | 63544.28013 | 0         |
|           | rvc_original_shape2D_Sphericity                        | 50629.48021 | 0         |
|           | rvc_original_firstorder_Entropy                        | 47690.18246 | 0         |
|           | rvc_original_shape2D_MeshSurface                       | 47304.58763 | 0         |
|           | rvc_original_gldm_Imc1                                 | 23222.23486 | 0         |
|           | rvc_original_gldm_LowGrayLevelEmphasis                 | 20117.45596 | 0         |
|           | rvc_original_firstorder_10Percentile                   | 16475.38832 | 0         |
|           | rvc_original_gldm_Correlation                          | 10142.88047 | 0         |
|           | rvc_original_shape2D_Elongation                        | 9493.814848 | 0         |
|           | rvc_original_gldm_ClusterShade                         | 6588.276342 | 0         |
|           | rvc_original_ngtdm_Strength                            | 6143.941558 | 0         |
| MYO-2D    | myo_original_shape2D_Elongation                        | 78701.22649 | 0         |
|           | myo_original_shape2D_PerimeterSurfaceRatio             | 28139.07476 | 0         |
|           | myo_original_ngtdm_Strength                            | 15237.73372 | 0         |
|           | myo_original_ngtdm_Contrast                            | 14561.11545 | 0         |
|           | myo_original_gldm_SmallDependenceLowGrayLevelEmphasis  | 10590.48295 | 0         |
|           | myo_original_firstorder_RootMeanSquared                | 10137.1095  | 0         |
|           | myo_original_gldm_Idmn                                 | 8763.984507 | 0         |
|           | myo_original_shape2D_MeshSurface                       | 8385.514582 | 0         |
|           | myo_original_firstorder_90Percentile                   | 8007.133039 | 0         |
|           | myo_original_gldm_LowGrayLevelEmphasis                 | 7136.382572 | 0         |
|           | myo_original_gldm_Imc1                                 | 5901.204943 | 0         |
|           | myo_original_ngtdm_Busyness                            | 5785.002057 | 0         |
| LVC-3D    | lvc_original_shape_Sphericity                          | 19163.79911 | 0         |
|           | lvc_original_shape_Maximum2DDiameterRow                | 7908.196003 | 0         |
|           | lvc_original_shape_MajorAxisLength                     | 2055.411936 | 0         |
|           | lvc_original_shape_Elongation                          | 1241.62525  | 2.64E-261 |
|           | lvc_original_shape_Maximum2DDiameterSlice              | 958.0524434 | 6.49E-204 |

|                                                                        |                                                         |             |           |
|------------------------------------------------------------------------|---------------------------------------------------------|-------------|-----------|
|                                                                        | lvc_original_shape_LeastAxisLength                      | 761.1015916 | 1.95E-163 |
|                                                                        | lvc_original_glcmm_ClusterShade                         | 587.4403886 | 2.62E-127 |
|                                                                        | lvc_original_glcmm_Idmn                                 | 461.3610504 | 8.22E-101 |
|                                                                        | lvc_original_shape_Maximum2DDiameterColumn              | 342.5007701 | 1.28E-75  |
|                                                                        | lvc_original_glcmm_Imc1                                 | 268.7967322 | 6.95E-60  |
|                                                                        | lvc_original_shape_Flatness                             | 226.9508617 | 6.54E-51  |
|                                                                        | lvc_original_ngtdm_Busyness                             | 194.3892976 | 6.62E-44  |
| RVC-3D                                                                 | rvcc_original_shape_Sphericity                          | 24842.78218 | 0         |
|                                                                        | rvcc_original_shape_SurfaceVolumeRatio                  | 8701.631141 | 0         |
|                                                                        | rvcc_original_glcmm_Autocorrelation                     | 5712.758803 | 0         |
|                                                                        | rvcc_original_gldm_LargeDependenceHighGrayLevelEmphasis | 5110.18352  | 0         |
|                                                                        | rvcc_original_glszm_SizeZoneNonUniformityNormalized     | 4695.42225  | 0         |
|                                                                        | rvcc_original_glcmm_Contrast                            | 4168.090624 | 0         |
|                                                                        | rvcc_original_shape_MajorAxisLength                     | 4012.95452  | 0         |
|                                                                        | rvcc_original_shape_MeshVolume                          | 3320.261963 | 0         |
|                                                                        | rvcc_original_firstorder_Range                          | 3052.4025   | 0         |
|                                                                        | rvcc_original_shape_Maximum2DDiameterSlice              | 2765.292385 | 0         |
|                                                                        | rvcc_original_firstorder_Entropy                        | 2724.8559   | 0         |
|                                                                        | rvcc_original_firstorder_Energy                         | 2428.71576  | 0         |
| MYO-3D                                                                 | myo_original_shape_Elongation                           | 3761.646652 | 0         |
|                                                                        | myo_original_shape_MeshVolume                           | 3337.559842 | 0         |
|                                                                        | myo_original_firstorder_Entropy                         | 2924.347996 | 0         |
|                                                                        | myo_original_shape_Maximum2DDiameterRow                 | 2630.873004 | 0         |
|                                                                        | myo_original_gldm_LargeDependenceLowGrayLevelEmphasis   | 2224.323444 | 0         |
|                                                                        | myo_original_ngtdm_Contrast                             | 2133.330609 | 0         |
|                                                                        | myo_original_shape_MajorAxisLength                      | 1967.988222 | 0         |
|                                                                        | myo_original_glcmm_Correlation                          | 1917.750964 | 0         |
|                                                                        | myo_original_firstorder_Energy                          | 1802.582054 | 0         |
|                                                                        | myo_original_shape_SurfaceVolumeRatio                   | 1413.340411 | 1.72E-295 |
|                                                                        | myo_original_firstorder_Skewness                        | 1242.226744 | 2.27E-261 |
|                                                                        | myo_original_ngtdm_Strength                             | 1008.304572 | 4.02E-214 |
| The bold lines represent features used in the best performance models. |                                                         |             |           |

Supplementary Table S9. Localization (whole heart segmentation) performance on independent external testing dataset.

| Disease type | DSC   | IoU   |
|--------------|-------|-------|
| HCM          | 0.863 | 0.791 |
| HHD          | 0.870 | 0.801 |
| DCM          | 0.889 | 0.824 |
| HC           | 0.865 | 0.794 |

Supplementary Table S10. RVC, LVC and MYO segmentation performance on independent external testing dataset.

| Cardiac sub-structure | 2D-DSC | 3D-DSC |
|-----------------------|--------|--------|
| RVC                   | 0.829  | 0.896  |
| LVC                   | 0.919  | 0.935  |
| MYO                   | 0.775  | 0.797  |

Supplementary Table S11. Classification model performance on independent external testing dataset with RF classifier.

|    | Cardiac<br>sub-structure | Accuracy | Precision | Recall | F1   | NDR  |
|----|--------------------------|----------|-----------|--------|------|------|
| 2D | LVC                      | 88.6     | 99.9      | 96.4   | 98.1 | 96.9 |
|    | RVC                      | 74.9     | 98.5      | 84.5   | 91.0 | 92.3 |
|    | MYO                      | 86.6     | 94.8      | 86.2   | 90.3 | 74.3 |
| 3D | LVC                      | 85.4     | 99.9      | 97.9   | 98.9 | 95.2 |
|    | RVC                      | 47.7     | 93.1      | 70.1   | 80.0 | 85.2 |
|    | MYO                      | 63.5     | 16.9      | 10.8   | 13.2 | 62.6 |

Supplementary Table S12. Regression model performance on independent external testing dataset with GB regressor.

| Cardiac<br>sub-structure |     | ALL   | DCM   | HC    | HCM   | HHD   |
|--------------------------|-----|-------|-------|-------|-------|-------|
| 2D-DSC<br>MAE            | LVC | 0.030 | 0.026 | 0.026 | 0.034 | 0.053 |
|                          | RVC | 0.183 | 0.209 | 0.185 | 0.147 | 0.169 |
|                          | MYO | 0.092 | 0.091 | 0.097 | 0.089 | 0.089 |
| 3D-DSC<br>MAE            | LVC | 0.045 | 0.040 | 0.033 | 0.064 | 0.041 |
|                          | RVC | 0.116 | 0.113 | 0.084 | 0.147 | 0.129 |
|                          | MYO | 0.183 | 0.156 | 0.289 | 0.121 | 0.147 |

Supplementary Table S13. MAE improvement among different anatomical structures for all segmentations and predicted good quality segmentations.

|    | parameter       | Cardiac sub-structure |        |        |
|----|-----------------|-----------------------|--------|--------|
|    |                 | RVC                   | MYO    | LVC    |
| 2D | MAE improvement | 0.052                 | 0.008  | 0.012  |
|    | P-value         | 0.231                 | 0.847  | 0.521  |
| 3D | MAE improvement | 0.085                 | 0.103  | 0.016  |
|    | P-value         | <0.001                | <0.001 | <0.001 |
